# Supplementary material for: Statistical Power to Detect Genetic (Co)Variance of Complex Traits Using SNP Data in Unrelated Samples
Source: PLoS Genet. 2014 Apr 10;10(4):e1004269. doi: 10.1371/journal.pgen.1004269 (PMC3983037; doi:10.1371/journal.pgen.1004269)

**Figure S1** Likelihood ratio test (LRT) statistic vs. Chi-squared test-statistic in a univariate analysis.  $LRT = 2(\ln L_1 - \ln L_0)$  with  $L_0$  and  $L_1$  being the log-likelihood function of REML evaluated under the null and alternative hypotheses respectively, and  $\chi^2 = \hat{h}_G^4 / \text{var}(\hat{h}_G^2)$  with the red dots representing  $\chi^2$  values calculated based on the observed sampling variance in the simulation and the blue crosses representing  $\chi^2$  values calculated based on the predicted sampling variance from our approximation theory. The simulations were performed at three levels of heritability, panel a)  $h_G^2 = 0.2$ , panel b)  $h_G^2 = 0.5$  and panel c)  $h_G^2 = 0.8$  (see Text S1 for details of the simulation design). Each plotted value is an average from 100 simulations.

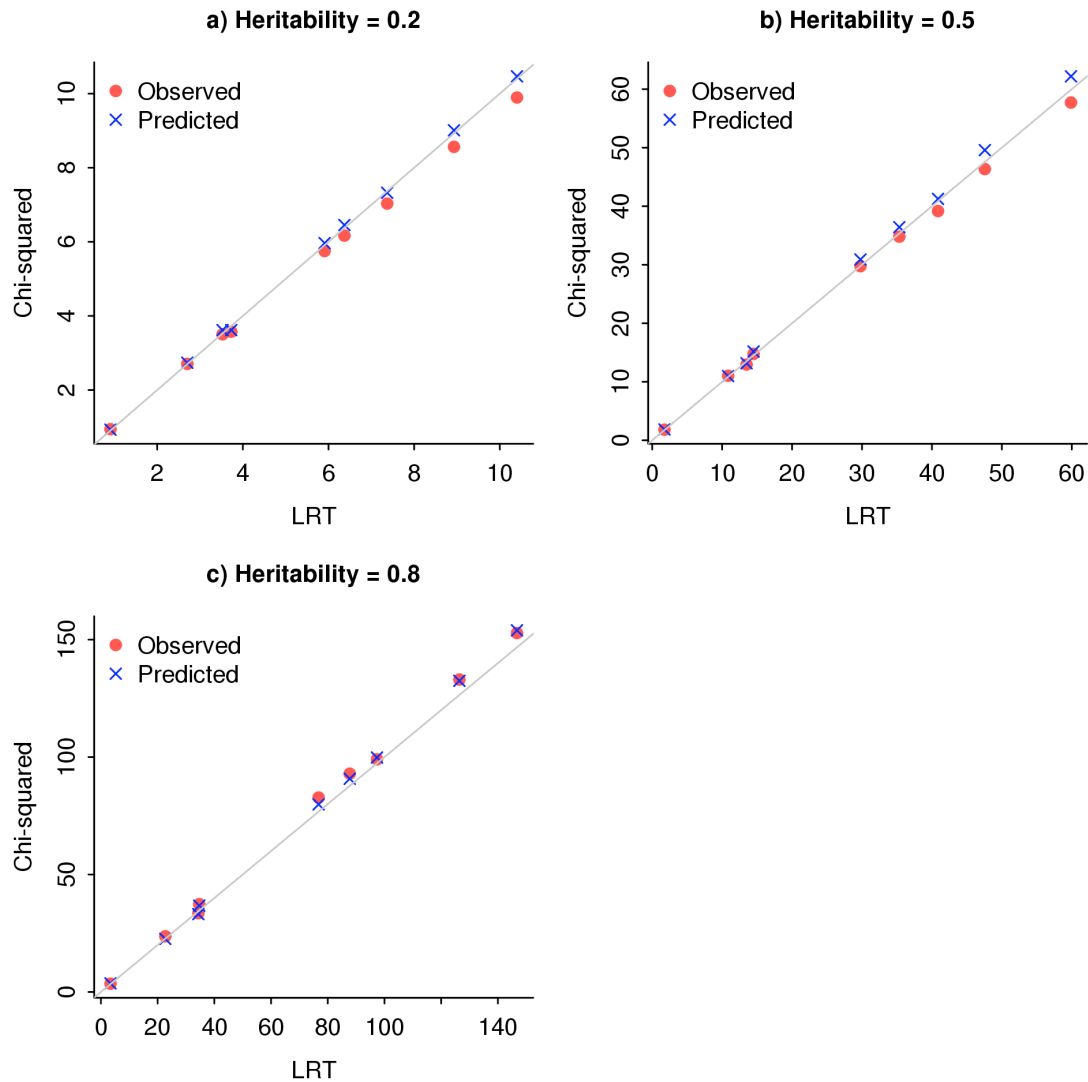

Supplement: Figure S1 — Likelihood ratio test (LRT) statistic vs. Chi-squared test-statistic in a univariate analysis. (PDF) [file pgen.1004269.s001.pdf]
