# Supplementary material for: Statistical Power to Detect Genetic (Co)Variance of Complex Traits Using SNP Data in Unrelated Samples
Source: PLOS journal article supplement (doi:10.1371/journal.pgen.1004269), 2014-04-10
Supplement: S2 (10.1371/journal.pgen.1004269.s002) [file journal.pgen.1004269.s002]

**Table S1** Standard error of the estimate of  $h_G^2$  (variance explained by all SNPs) observed from 100 simulations vs. that calculated from our approximation theory.

| $N$  | $h_G^2 = 0.2$ |               | $h_G^2 = 0.5$ |               | $h_G^2 = 0.8$ |               | SE (Approx.) |
|------|---------------|---------------|---------------|---------------|---------------|---------------|--------------|
|      | SE (Obs.)     | <i>s.e.m.</i> | SE (Obs.)     | <i>s.e.m.</i> | SE (Obs.)     | <i>s.e.m.</i> |              |
| 500  | 0.63          | 2.6E-03       | 0.63          | 2.3E-03       | 0.63          | 1.3E-03       | 0.63         |
| 1000 | 0.31          | 9.8E-04       | 0.32          | 8.0E-04       | 0.32          | 4.6E-04       | 0.32         |
| 1500 | 0.21          | 5.5E-04       | 0.21          | 3.8E-04       | 0.21          | 2.4E-04       | 0.21         |
| 2000 | 0.16          | 3.6E-04       | 0.16          | 2.6E-04       | 0.16          | 1.9E-04       | 0.16         |
| 2500 | 0.13          | 2.6E-04       | 0.13          | 1.9E-04       | 0.13          | 1.1E-04       | 0.13         |
| 3000 | 0.11          | 1.9E-04       | 0.11          | 1.4E-04       | 0.11          | 9.9E-05       | 0.11         |
| 3500 | 0.09          | 1.9E-04       | 0.09          | 1.1E-04       | 0.09          | 8.8E-05       | 0.09         |
| 4000 | 0.08          | 1.4E-04       | 0.08          | 8.9E-05       | 0.08          | 6.6E-05       | 0.08         |
| 4500 | 0.07          | 1.3E-04       | 0.07          | 7.1E-05       | 0.07          | 5.9E-05       | 0.07         |
| 5000 | 0.06          | 9.7E-05       | 0.07          | 4.6E-05       | 0.06          | 5.7E-05       | 0.06         |

$N$ : sample size.  $h_G^2$ : heritability parameter used in simulations. SE(Obs.): mean of the observed standard errors from 100 simulations. *s.e.m.*: standard error of the mean (i.e. SE(Obs.)). SE(Approx.): standard error calculated from our approximation theory.
