# Supplementary material for: Statistical Power to Detect Genetic (Co)Variance of Complex Traits Using SNP Data in Unrelated Samples
Source: PLoS Genet. 2014 Apr 10;10(4):e1004269. doi: 10.1371/journal.pgen.1004269 (PMC3983037; doi:10.1371/journal.pgen.1004269)
Supplement: Text S2 — Sampling variance of genetic correlation. (PDF) [file pgen.1004269.s004.pdf]

### Text S2: Sampling variance of genetic correlation

Assume that two traits  $y_1$  and  $y_2$  are measured on all individuals with heritabilities of  $h_1^2$  and  $h_2^2$ , genetic correlation of  $r_G$ , and phenotypic correlation of  $r_p$ . Assume that  $y_1$  and  $y_2$  are standardised so that  $E(y_1) = E(y_2) = 0$  and  $\text{var}(y_1) = \text{var}(y_2) = 1$ . If we construct two new traits,

$$z_1 = y_1 + y_2 = a_1 + e_1 \text{ and } z_2 = y_1 - y_2 = a_2 + e_2$$

where  $a_1$  and  $a_2$  are the genetic effects, we then have

$$\text{var}(z_1) = 2(1 + r_p), \text{var}(z_2) = 2(1 - r_p) \text{ and } \text{cov}(z_1, z_2) = 0$$

$$\text{var}(a_1) = h_1^2 + h_2^2 + 2h_1 h_2 r_G, \text{var}(a_2) = h_1^2 + h_2^2 - 2h_1 h_2 r_G, \text{ and } \text{cov}(a_1, a_2) = h_1^2 - h_2^2$$

If we denote  $h_{z1}^2$  and  $h_{z2}^2$  as the heritabilities for the two new traits, then

$$h_{z1}^2 = \text{var}(a_1) / \text{var}(z_1) \text{ and } h_{z2}^2 = \text{var}(a_2) / \text{var}(z_2)$$

We know from our derivations above that  $\text{var}(\hat{h}_{z1}^2) = \text{var}(\hat{h}_{z2}^2) = 2 / [N^2 \text{var}(A_{ij})]$ , with  $N$  being the sample size and  $\text{var}(A_{ij})$  being the variance of the genetic relationship between individuals  $i$  and  $j$ .

We can calculate  $r_G$  from the equations above

$$r_G = [\text{var}(a_1) - \text{var}(a_2)] / [\text{var}(a_1) + \text{var}(a_2) - 2(h_1 - h_2)^2]$$

Let  $\alpha = \text{var}(a_1)$ ,  $\beta = \text{var}(a_2)$  and  $\Delta = 2(h_1 - h_2)^2$ , then

$$\hat{r}_G = [\hat{\alpha} - \hat{\beta}] / [\hat{\alpha} + \hat{\beta} - \hat{\Delta}]$$

A first order Taylor approximation of the sampling variance of  $\hat{r}_G$  is

$$\text{var}(\hat{r}_G) \approx \left( \frac{\partial \hat{r}_G}{\partial \hat{\alpha}} \right)^2 \text{var}(\hat{\alpha}) + \left( \frac{\partial \hat{r}_G}{\partial \hat{\beta}} \right)^2 \text{var}(\hat{\beta}) + 2 \frac{\partial \hat{r}_G}{\partial \hat{\alpha}} \frac{\partial \hat{r}_G}{\partial \hat{\beta}} \text{cov}(\hat{\alpha}, \hat{\beta})$$

where the sampling variance of  $\hat{\Delta}$  is ignored because  $\hat{\Delta}$  is likely to be small.

Since  $\frac{\partial \hat{r}_G}{\partial \hat{\alpha}} = \frac{2\hat{\beta} - \hat{\Delta}}{(\hat{\alpha} + \hat{\beta} - \hat{\Delta})^2}$  and  $\frac{\partial \hat{r}_G}{\partial \hat{\beta}} = \frac{-2\hat{\alpha} + \hat{\Delta}}{(\hat{\alpha} + \hat{\beta} - \hat{\Delta})^2}$ , we can get

$$\frac{\partial \hat{r}_G}{\partial \hat{\alpha}} = \frac{2(\hat{h}_1^2 + \hat{h}_2^2 - 2\hat{r}_G\sqrt{\hat{h}_1^2\hat{h}_2^2}) - 2(\hat{h}_1^2 + \hat{h}_2^2 - 2\sqrt{\hat{h}_1^2\hat{h}_2^2})}{16\hat{h}_1^2\hat{h}_2^2} = \frac{1 - \hat{r}_G}{4\sqrt{\hat{h}_1^2\hat{h}_2^2}}$$

$$\frac{\partial \hat{r}_G}{\partial \hat{\beta}} = \frac{-2(\hat{h}_1^2 + \hat{h}_2^2 + 2\hat{r}_G\sqrt{\hat{h}_1^2\hat{h}_2^2}) + 2(\hat{h}_1^2 + \hat{h}_2^2 - 2\sqrt{\hat{h}_1^2\hat{h}_2^2})}{16\hat{h}_1^2\hat{h}_2^2} = \frac{-1 - \hat{r}_G}{4\sqrt{\hat{h}_1^2\hat{h}_2^2}}$$

Since  $\text{cov}(z_1, z_2) = 0$ ,  $\text{cov}(\hat{\alpha}, \hat{\beta}) \approx 0$  so that

$$\begin{aligned} \text{var}(\hat{r}_G) &\approx \left( \frac{1 - \hat{r}_G}{4\sqrt{\hat{h}_1^2\hat{h}_2^2}} \right)^2 \text{var}(\hat{\alpha}) + \left( \frac{1 + \hat{r}_G}{4\sqrt{\hat{h}_1^2\hat{h}_2^2}} \right)^2 \text{var}(\hat{\beta}) \\ &= \frac{(1 - \hat{r}_G)^2}{16\hat{h}_1^2\hat{h}_2^2} [\text{var}(z_1)]^2 \text{var}(\hat{h}_{z_1}^2) + \frac{(1 + \hat{r}_G)^2}{16\hat{h}_1^2\hat{h}_2^2} [\text{var}(z_2)]^2 \text{var}(\hat{h}_{z_1}^2) \\ &= \frac{(1 - \hat{r}_G r_P)^2 + (\hat{r}_G - r_P)^2}{\hat{h}_1^2\hat{h}_2^2 N^2 \text{var}(A_{ij})} \end{aligned}$$

For power calculation, we can substitute the estimates with the true parameters. We then have

$$\text{var}(\hat{r}_G) \approx \frac{(1 - r_G r_P)^2 + (r_G - r_P)^2}{h_1^2 h_2^2 N^2 \text{var}(A_{ij})}$$
